# Supplementary material for: Controllable synthesis of electric double-layer capacitance and pseudocapacitance coupled porous carbon cathode material for zinc-ion hybrid capacitors
Source: Royal Society of Chemistry journal article supplement (doi:10.1039/d3nr06258a), 2024-01-01
Supplement: d3nr06258a1.pdf [file d3nr06258a1.pdf]

## Supporting Information

### **Controllable synthesis of electric double layer capacitance and pseudocapacitance coupled porous carbon cathode material for zinc-ion hybrid capacitors**

Xiaoyi Pan <sup>a#</sup>, Qian Li <sup>a#</sup>, Tongde Wang <sup>b</sup>, Tie Shu <sup>c</sup> Yousheng Tao <sup>a\*</sup>

<sup>a</sup> College of Materials Science and Engineering, Sichuan University, Chengdu, 610065, People's Republic of China

<sup>b</sup> Shanghai Key Laboratory of Special Artificial Microstructure Materials and Technology, School of Physics Science and Engineering, Tongji University, Shanghai 200092, China.

<sup>c</sup> Multi-scale Porous Materials Center, Institute of Advanced Interdisciplinary Studies, & School of Chemistry and Chemical Engineering, Chongqing University, Chongqing 400044, People's Republic of China

\*Corresponding author. E-mails: taoyys@scu.edu.cn (Yousheng Tao)

# Xiaoyi Pan and Qian Li contributed equally to this manuscript.

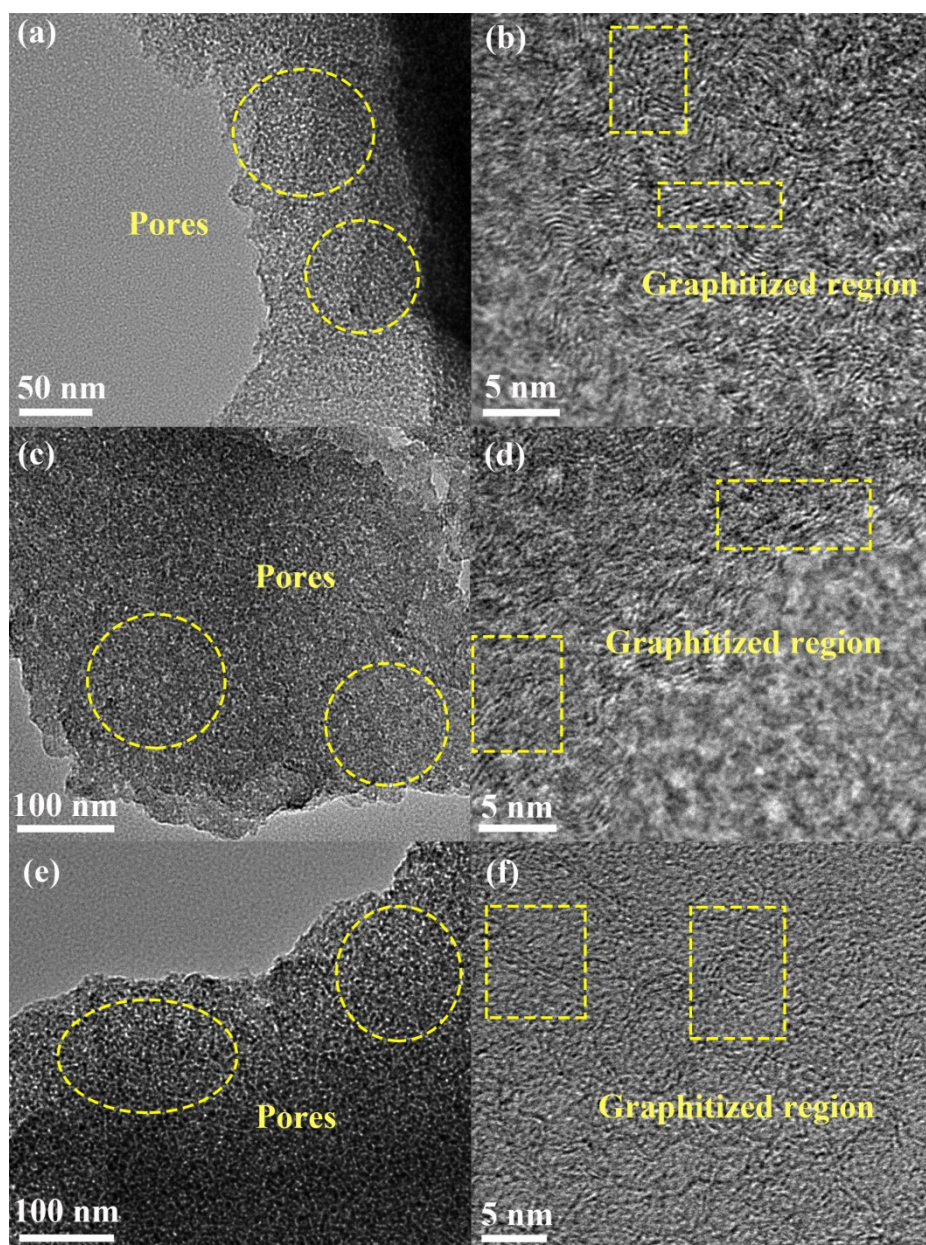

Figure S1 TEM image of (a,b) Pure, (c,d) SA-2, (e,f) SA-4.

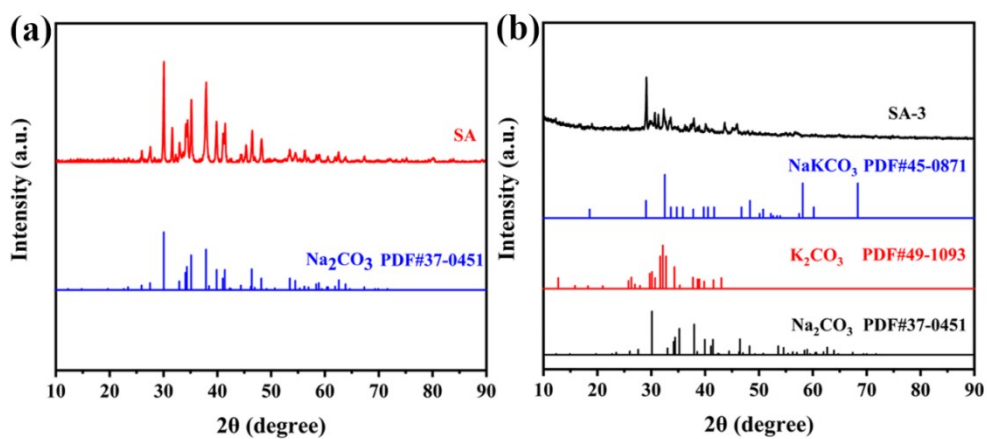

Figure S2 XRD before cleaning

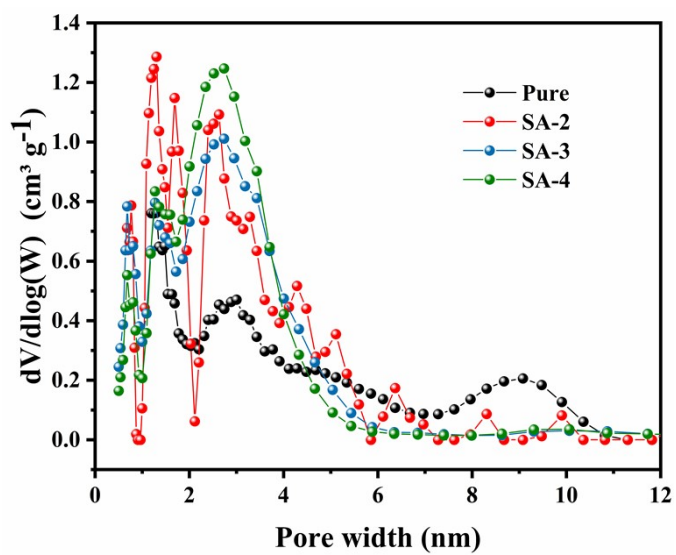

Figure S3 pore size distributions of Pure, SA-2, SA-3 and SA-4

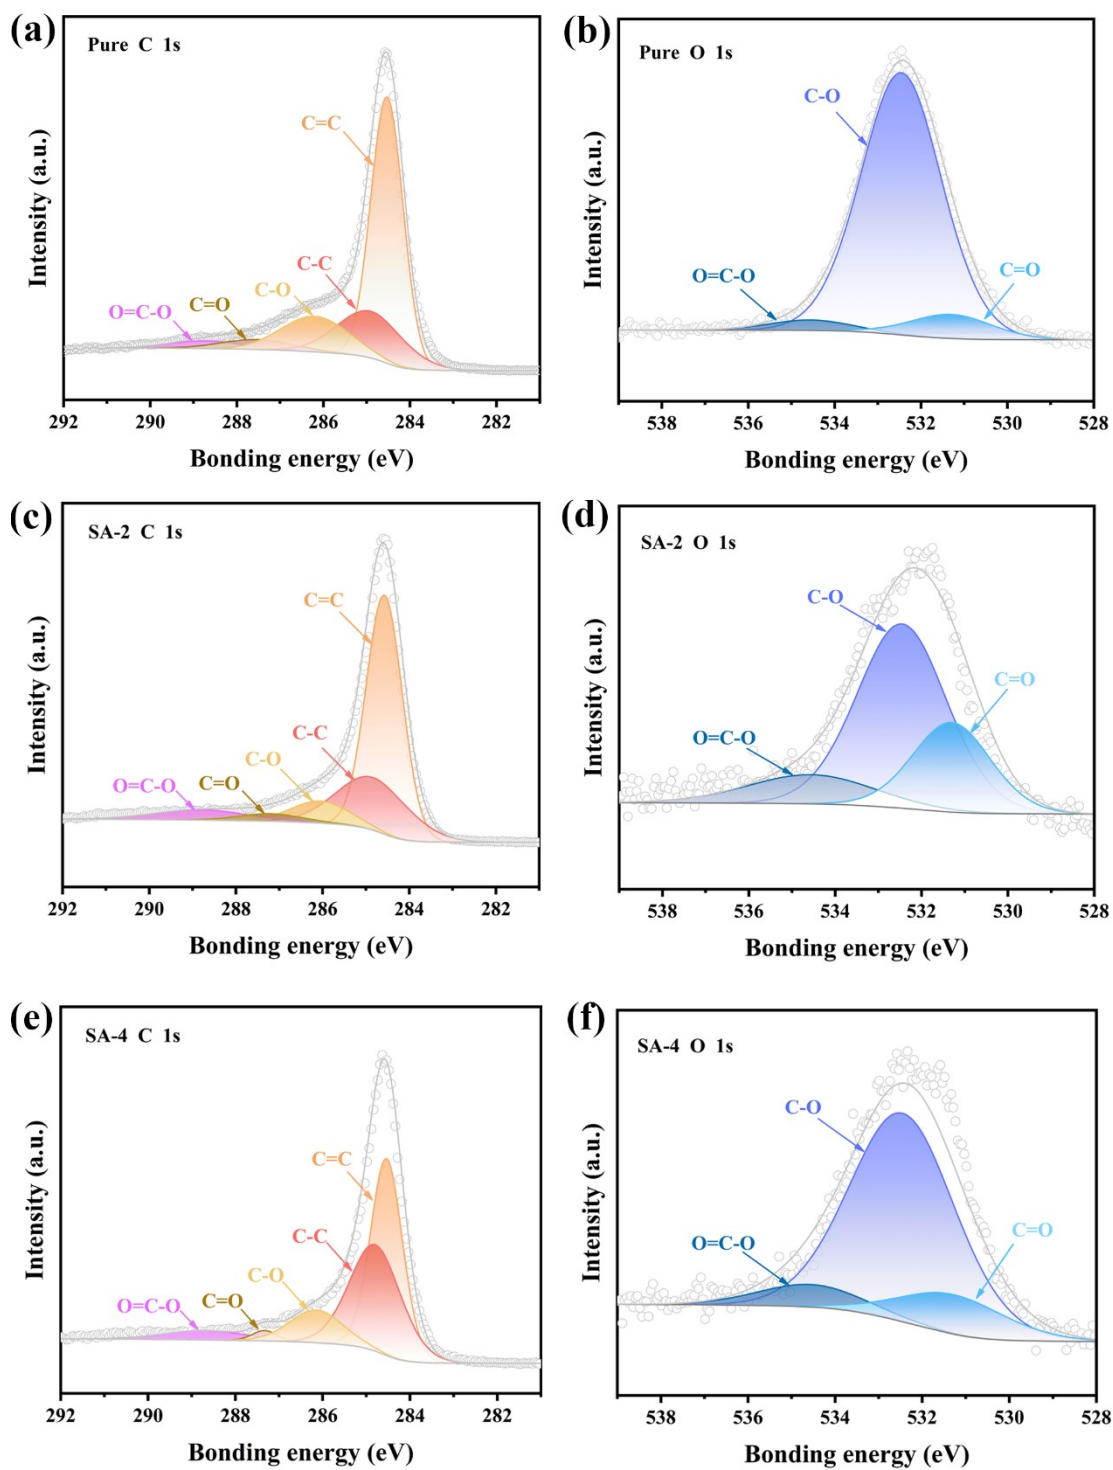

Figure S4 XPS high-resolution spectra of C 1s and O 1s for (a, b) Pure, (c, d) SA-2, (e, f) SA-4.

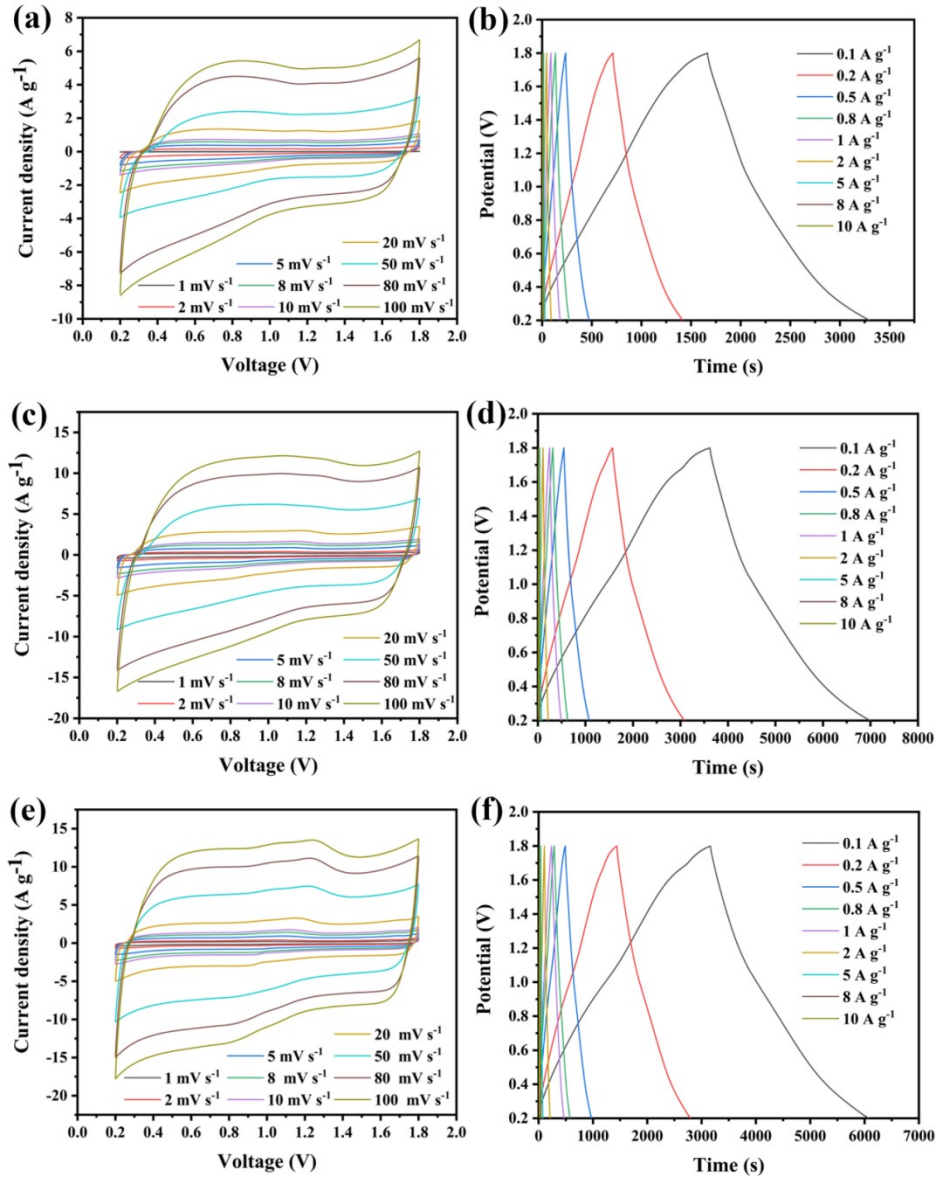

Figure S5 CV curves and GCD plots of (a, b) Pure, (c, d) SA-2, (e, f) SA-4.



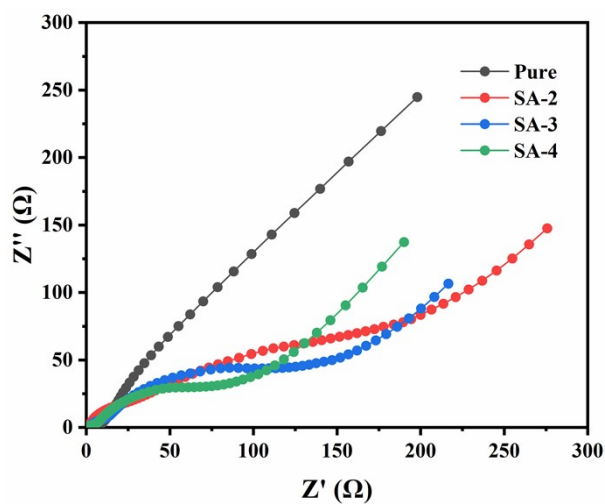

Figure S6 EIS plots of different samples.

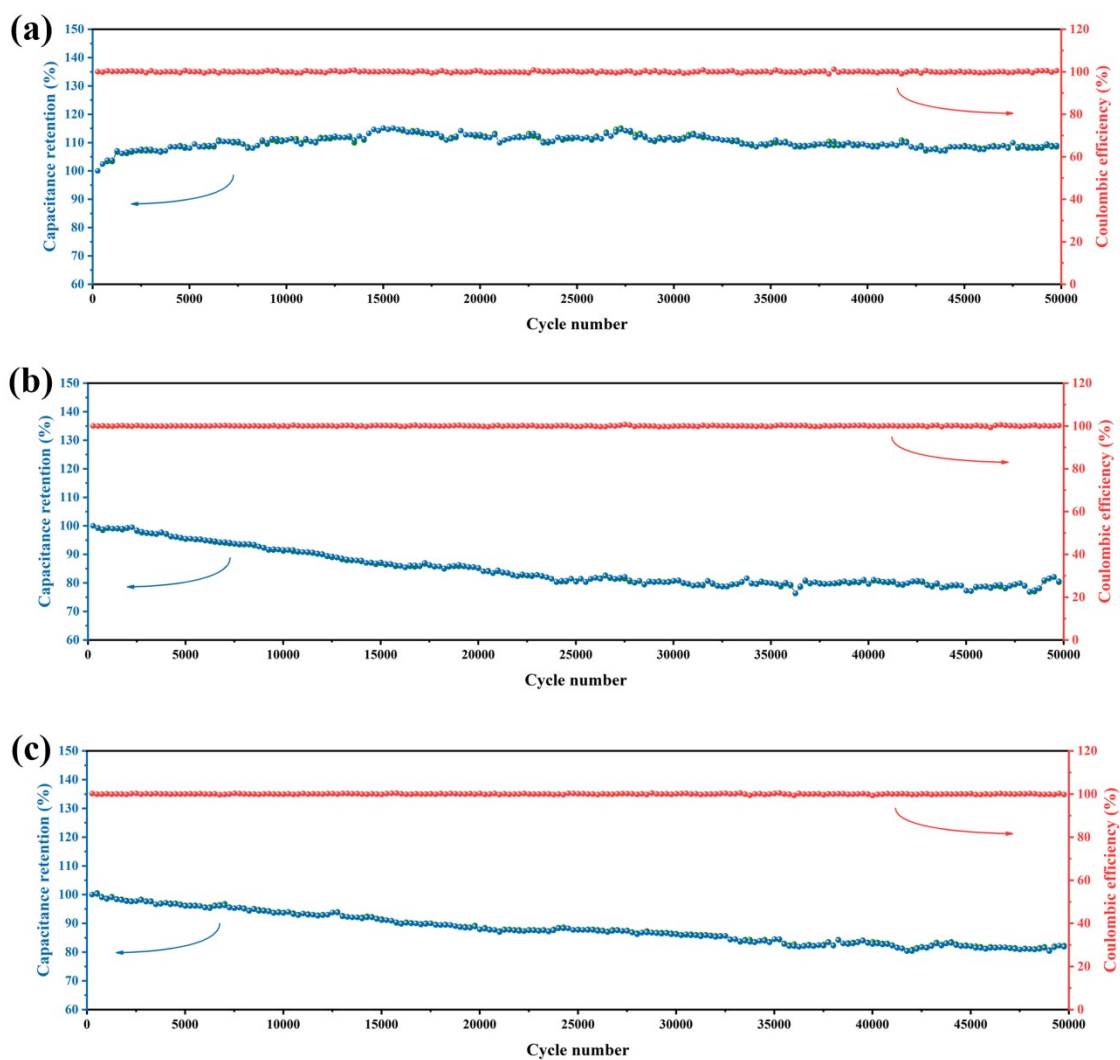

Figure S7 circling performance for ZIHCs based on (a) Pure, (b) SA-2, (c) SA-4 at 5A

$g^{-1}$ .

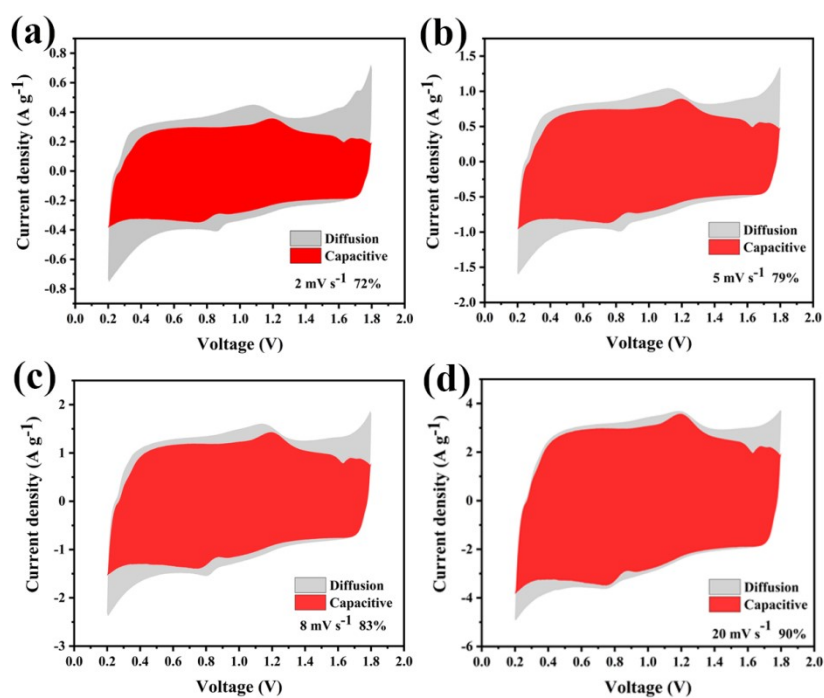

Figure S8 the capacitive contribution at different scan rates of SA-3.

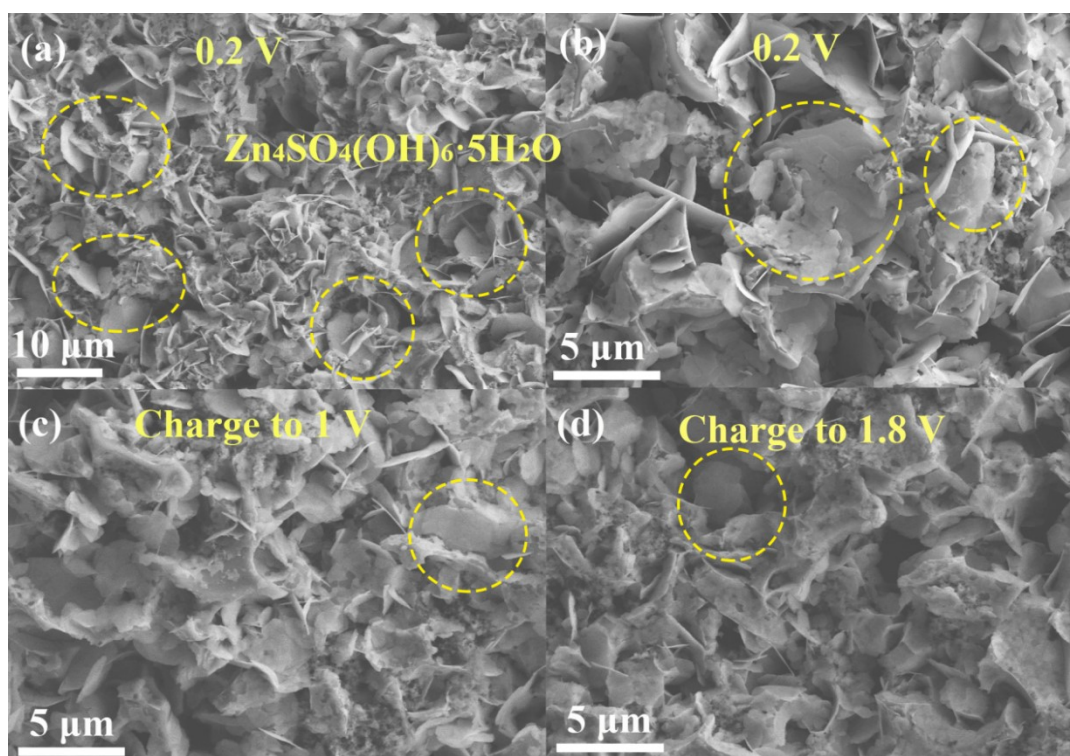

Figure S9 SEM of SA-3 (a) and (b)  $0.2 \text{ V}$ , (c) charge to  $1 \text{ V}$ , (d) charge to  $1.8 \text{ V}$

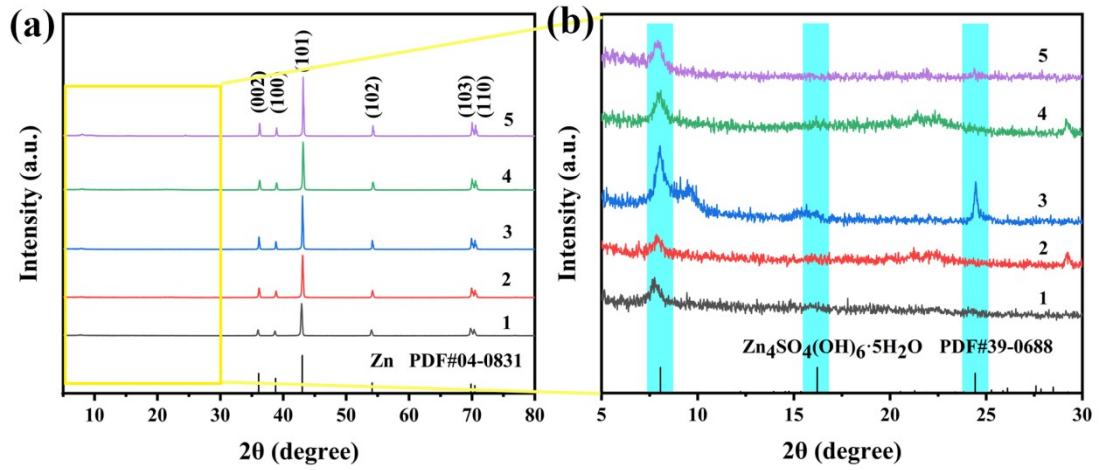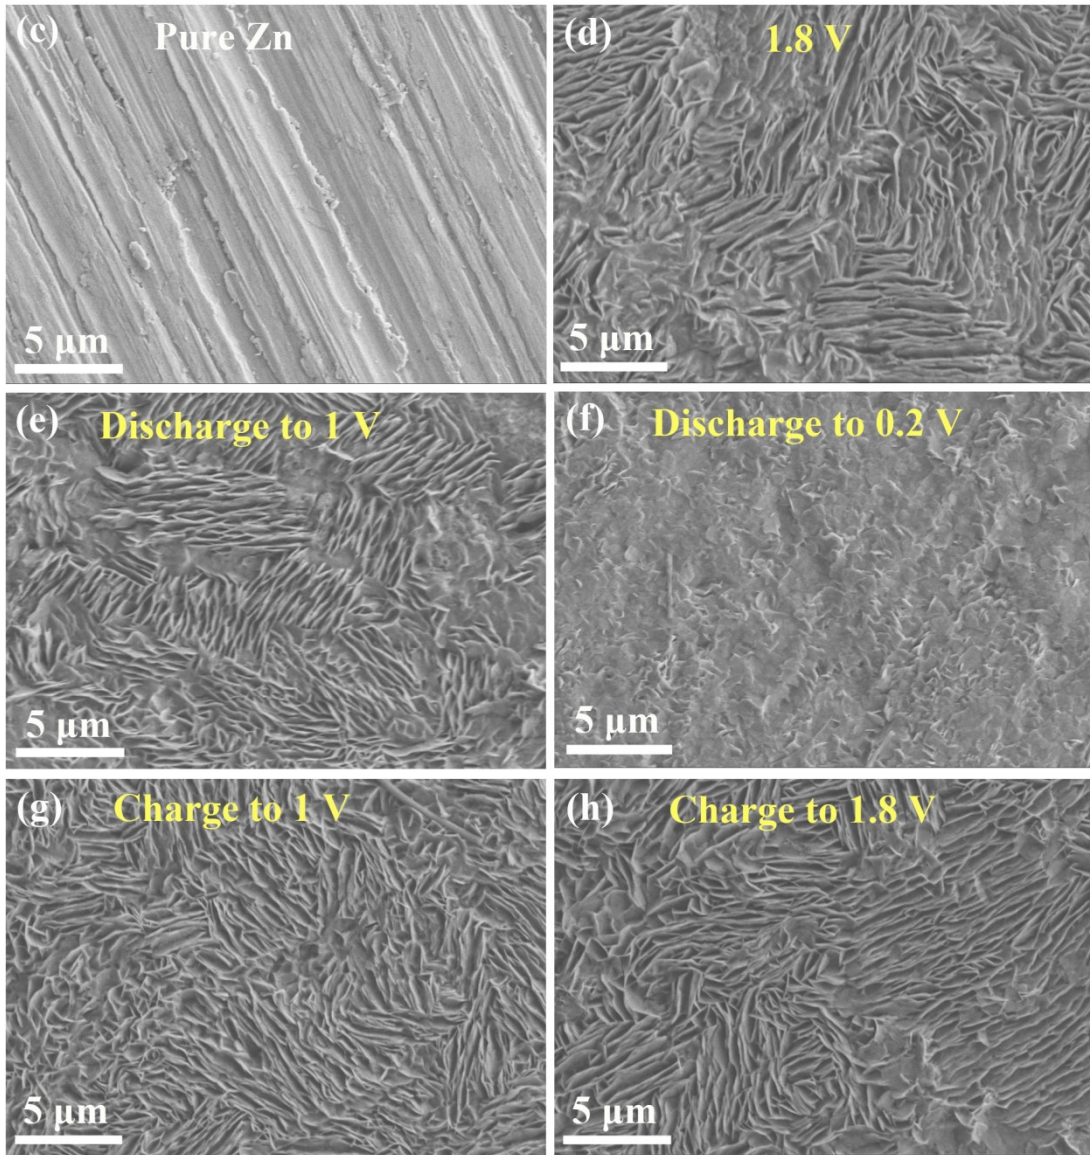



Figure S10 (a) the ex situ XRD pattern for corresponding potential of Zn anode, (b) enlarged view for b) ranging from  $5^\circ$  to  $30^\circ$ . SEM image for (c) pure Zn, (d) 1.8 V, (e) discharging to 1 V, (f) discharging to 0.2 V, (g) charging to 1 V, (h) charging to 1.8 V of Zn anode.

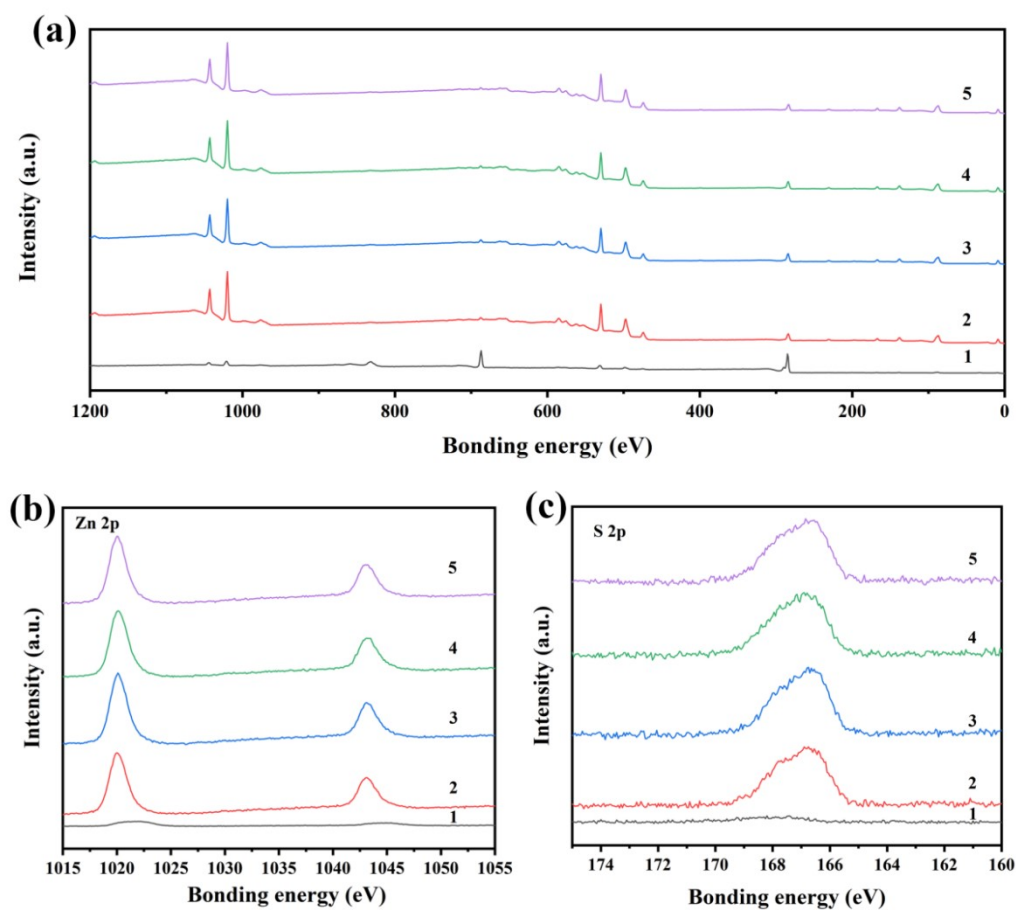

Figure S11 (a) XPS spectrum, XPS spectrum for (b) Zn 2p and (c) S 2p

Table S1 Structural parameters of Pure and SA-x samples

| Sample | $S_{\text{BET}}/\text{m}^2 \text{ g}^{-1}$ | $S_{\text{micro}}/\text{m}^2 \text{ g}^{-1}$ | $V_{\text{total}}/\text{cm}^3 \text{ g}^{-1}$ | $V_{\text{micro}}/\text{cm}^3 \text{ g}^{-1}$ |
|--------|--------------------------------------------|----------------------------------------------|-----------------------------------------------|-----------------------------------------------|
| Pure   | 883                                        | 329                                          | 0.28                                          | 0.16                                          |
| SA-2   | 1216                                       | 475                                          | 0.45                                          | 0.21                                          |
| SA-3   | 1321                                       | 456                                          | 0.46                                          | 0.21                                          |
| SA-4   | 1266                                       | 237                                          | 0.45                                          | 0.13                                          |

Table S2 C, O ratio of SA-x samples

|             | C (%) |       |       |      |       | O (%) |       |       |
|-------------|-------|-------|-------|------|-------|-------|-------|-------|
|             | C=C   | C-C   | C-O   | C=O  | O=C-O | C=O   | C-O   | O=C-O |
| <b>Pure</b> | 55.98 | 20.08 | 15.64 | 4.67 | 3.63  | 8.09  | 88.41 | 3.50  |
| <b>SA-2</b> | 57.03 | 24.92 | 8.50  | 3.24 | 6.33  | 25.68 | 60.83 | 13.49 |
| <b>SA-3</b> | 51.63 | 28.96 | 9.54  | 2.31 | 7.56  | 19.24 | 73.25 | 7.51  |
| <b>SA-4</b> | 43.22 | 37.71 | 11.92 | 1.76 | 5.38  | 14.58 | 77.11 | 8.31  |

Table S3 Performance comparison of our ZIHC with reported ZIHCs.

| ZIHCs                                                         | Energy/Power density                                                                                 | Potential window | Cycle stability                          |
|---------------------------------------------------------------|------------------------------------------------------------------------------------------------------|------------------|------------------------------------------|
| Zn// 1 M ZnSO <sub>4</sub> //                                 | 92 W h kg <sup>-1</sup> / 99.5 W kg <sup>-1</sup>                                                    | 0.1-1.45         | --                                       |
| ASICKOH <sup>1</sup>                                          | 43 W h kg <sup>-1</sup> /1.03 kW kg <sup>-1</sup>                                                    | V                |                                          |
| Zn// 1 M Zn(CF <sub>3</sub> SO <sub>3</sub> ) <sub>2</sub> // | 61.6 W h kg <sup>-1</sup> /72 W kg <sup>-1</sup>                                                     |                  | 20,000 cycles/ 91%/ 1 A                  |
| AC <sup>2</sup>                                               | 52.7 W h kg <sup>-1</sup> /1.73 kW kg <sup>-1</sup>                                                  | 0-1.8 V          | g <sup>-1</sup>                          |
| Zn// 1 M ZnSO <sub>4</sub> // L-NS-CNS <sup>3</sup>           | 91 W h kg <sup>-1</sup> /94 W kg <sup>-1</sup><br>33.8 W h kg <sup>-1</sup> /9.9 kW kg <sup>-1</sup> | 0.2-1.8 V        | 18000 cycles/ 94.2%/ 2 A g <sup>-1</sup> |
| Zn// 1 M ZnSO <sub>4</sub> //                                 | 142.2 W h kg <sup>-1</sup> /400.3 W kg <sup>-1</sup>                                                 |                  | 10000 cycle/ 90%/ 10 A                   |
| PCNF-4 <sup>4</sup>                                           | 68.4 W h kg <sup>-1</sup> /15.39 kW kg <sup>-1</sup>                                                 | 0.1-1.7 V        | g <sup>-1</sup>                          |
| Zn// 2 M ZnSO <sub>4</sub> //                                 | 129.3 W h kg <sup>-1</sup> /266.4 W kg <sup>-1</sup>                                                 |                  | 10000 cycle/ 96%/ 1 A                    |
| MCHSs <sup>5</sup>                                            | 36.8 W h kg <sup>-1</sup> /13.7 kW kg <sup>-1</sup>                                                  | 0.2-1.8 V        | g <sup>-1</sup>                          |
| Zn// 2 M ZnSO <sub>4</sub> // PU 46                           | 117.5 W h kg <sup>-1</sup> /890 W kg <sup>-1</sup>                                                   | 0.1-1.8 V        |                                          |

---

|                  |                                                      |                              |
|------------------|------------------------------------------------------|------------------------------|
|                  | 60.7 W h kg <sup>-1</sup> /16.2 kW                   |                              |
|                  | kg <sup>-1</sup>                                     |                              |
| <b>This work</b> | <b>100 W h kg<sup>-1</sup>/100 W kg<sup>-1</sup></b> | <b>50000 cycle/ 93%/ 5 A</b> |
|                  | <b>58 W h kg<sup>-1</sup>/9.9 kW kg<sup>-1</sup></b> | <b>0.2-1.8 V</b>             |
|                  |                                                      | <b>g<sup>-1</sup></b>        |

---

1. Naik, P. B.; Yadav, P.; Nagaraj, R.; Puttaswamy, R.; Beere, H. K.; Maiti, U. N.; Mondal, C.; Kotrappanavar, N. S.; Ghosh, D., Developing High-Performance Flexible Zinc Ion Capacitors from Agricultural Waste-Derived Carbon Sheets. *Acs Sustainable Chemistry & Engineering* **2022**, *10* (4), 1471-1481.<http://dx.doi.org/10.1021/acssuschemeng.1c06569>
2. Wang, H.; Wang, M.; Tang, Y., A novel zinc-ion hybrid supercapacitor for long-life and low-cost energy storage applications. *Energy Storage Materials* **2018**, *13*, 1-7.<http://dx.doi.org/10.1016/j.ensm.2017.12.022>
3. Jian, W.; Zhang, W.; Wei, X.; Wu, B.; Liang, W.; Wu, Y.; Yin, J.; Lu, K.; Chen, Y.; Alshareef, H. N.; Qiu, X., Engineering Pore Nanostructure of Carbon Cathodes for Zinc Ion Hybrid Supercapacitors. *Advanced Functional Materials* **2022**, *32* (49).<http://dx.doi.org/10.1002/adfm.202209914>
4. Pan, Z.; Lu, Z.; Xu, L.; Wang, D., A robust 2D porous carbon nanoflake cathode for high energy-power density Zn-ion hybrid supercapacitor applications. *Applied Surface Science* **2020**, *510*.<http://dx.doi.org/10.1016/j.apsusc.2020.145384>
5. Liu, P.; Liu, W.; Huang, Y.; Li, P.; Yan, J.; Liu, K., Mesoporous hollow carbon spheres boosted, integrated high performance aqueous Zn-Ion energy storage.



865.<http://dx.doi.org/10.1016/j.ensm.2019.09.004>

6. Fan, H.; Zhou, S.; Li, Q.; Gao, G.; Wang, Y.; He, F.; Hu, G.; Hu, X., Hydrogen-bonded frameworks crystals-assisted synthesis of flower-like carbon materials with penetrable meso/macropores from heavy fraction of bio-oil for Zn-ion hybrid supercapacitors. *Journal of Colloid and Interface Science* **2021**, *600*, 681-690.<http://dx.doi.org/10.1016/j.jcis.2021.05.042>
